# Supplementary material
Source: ML conference proceedings conference paper supplement (https://proceedings.neurips.cc/paper_files/paper/2009/hash/92cc227532d17e56e07902b254dfad10-Abstract.html)
Supplement: Supplementary file [file 92cc227532d17e56e07902b254dfad10-Supplemental.zip]

---

# Correction: Kernels and learning curves for Gaussian process regression on random graphs

---

**Peter Sollich, Matthew J Urry**  
King's College London, Department of Mathematics  
London WC2R 2LS, U.K.  
`{peter.sollich, matthew.urry}@kcl.ac.uk`

**Camille Coti**  
INRIA Saclay Île de France, F-91893 Orsay, France

There is a typographical error in equation (7): the factor multiplying  $\ell$  should read  $(d - 2)/d$ , not  $(d - 1)/d$ .
